# Supplementary material for: A Novel Competing Endogenous RNA Network Associated With the Pathogenesis of Graves’ Ophthalmopathy
Source: Front Genet. 2021 Dec 15;12:795546. doi: 10.3389/fgene.2021.795546 (PMC8714659; doi:10.3389/fgene.2021.795546)
Supplement: Supplementary file 13 [file Table8.XLSX]

## Sheet: result
Group	Control						Test						test-control	Fold Change	Regulation	P Value
Sample	Control1	Control2	Control3	Control4	Control5	Average ΔCt	TAO1	TAO2	TAO3	TAO4	TAO5	Average ΔCt	ΔΔCt	2-ΔΔCt
Gene	ΔCt						ΔCt
BDKRB1	11.1907	13.0023	10.8597	12.558	12.4507	12.0123	13.571	13.3277	10.424	10.3587	12.3793	12.0121	-0.000133333	1.00009	UP	0.999872
CHRM3	11.9757	11.4417	11.3933	12.748	10.782	11.6681	8.854	10.879	9.791	8.67533	9.277	9.49527	-2.17287	4.50918	UP	0.00292163
CXCL1	9.18867	9.97667	9.229	9.74367	7.409	9.1094	5.38633	6.491	7.67367	8.834	6.70867	7.01873	-2.09067	4.25945	UP	0.0217748
ENST00000499452	14.0297	14.8947	14.656	13.6187	13.7537	14.1905	11.8973	12.4337	9.68867	12.461	12.4693	11.79	-2.40053	5.27998	UP	0.00365912
ENST00000613838	10.8107	10.425	9.49633	9.95767	9.86567	10.1111	10.3747	11.0583	8.759	10.3713	11.5187	10.4164	0.305333	0.809255	DOWN	0.573951
ENST00000645807	11.2653	11.0833	11.542	11.4787	10.2977	11.1334	15.9113	10.4897	10.928	10.7973	10.5847	11.7422	0.6088	0.655742	DOWN	0.584609
ENST00000658492	10.744	10.232	9.651	10.5393	9.57433	10.1481	9.66067	9.30033	10.5877	9.71367	9.90633	9.83373	-0.3144	1.24349	UP	0.348558
FPR2	11.7813	13.9347	12.717	12.7797	13.3467	12.9119	9.40733	10.06	8.371	8.956	8.87067	9.133	-3.77887	13.7263	UP	3.46081e-05
LINC01820:13	9.85167	9.38667	8.78033	9.15067	7.84933	9.00373	8.00067	7.96033	7.76667	7.52133	7.75367	7.80053	-1.2032	2.3025	UP	0.00855076
THBS2	5.77767	7.77333	6.06	6.39367	7.18433	6.6378	8.292	7.896	7.76533	7.327	6.647	7.58547	0.947667	0.51847	DOWN	0.0751443
